# Supplementary material for: Recycling of carbon fibre reinforced plastics by electrically driven heterogeneous catalytic degradation of epoxy resin
Source: Royal Society of Chemistry journal article supplement (doi:10.1039/c8gc03672a), 2019-01-01
Supplement: c8gc03672a1.pdf [file c8gc03672a1.pdf]

## Supporting Information

### Green and No-Size-Limit Recycling of CFRP by Electrically Driven Heterogeneous Catalysis

**Table SI 1 Experimental data of epoxy resin removal**

|                       |            |            |            |            |            |            |
|-----------------------|------------|------------|------------|------------|------------|------------|
| Specimens             | I20S0.5    | I20S1      | I20S2      | I20S3      | I40S0.5    | I40S1      |
| Parallel test results | 67.9       | 89.3       | 95.1       | 89.6       | 66.3       | 89.0       |
|                       | 67.7       | 89.4       | 95.9       | 91.2       | 67.0       | 88.9       |
|                       | 69.4       | 90.1       | 96.3       | 90.5       | 67.9       | 90.1       |
| Mean                  | 68.3       | 89.6       | 95.8       | 90.4       | 67.1       | 89.3       |
| CoV                   | 0.014      | 0.005      | 0.006      | 0.009      | 0.012      | 0.007      |
| Specimens             | I40S2      | I40S3      | I62.5S0.5  | I62.5S1    | I62.5S2    | I62.5S3    |
| Parallel test results | 93.0       | 90.7       | 64.2       | 66.6       | 68.3       | 68.8       |
|                       | 93.4       | 89.5       | 64.1       | 65.9       | 68.4       | 64.5       |
|                       | 94.7       | 89.1       | 61.6       | 64.0       | 68.8       | 65.1       |
| Mean                  | 93.7       | 89.8       | 63.3       | 65.5       | 68.5       | 66.1       |
| CoV                   | 0.009      | 0.009      | 0.023      | 0.021      | 0.004      | 0.035      |
| Specimens             | I20S1K0.5  | I20S1K1    | I20S1K1.5  | I20S2K0.5  | I20S2K1    | I20S2K1.5  |
| Parallel test results | 100.0      | 99.4       | 100.0      | 100.0      | 99.6       | 99.9       |
|                       | 99.9       | 98.7       | 100.0      | 99.9       | 99.7       | 98.8       |
|                       | 99.2       | 100.6      | 100.0      | 99.6       | 99.7       | 99.9       |
| Mean                  | 99.7       | 99.6       | 100.0      | 99.8       | 99.7       | 99.5       |
| CoV                   | 0.004      | 0.010      | 0.000      | 0.002      | 0.001      | 0.006      |
| Specimens             | I20S3K0.5  | I20S3K1    | I20S3K1.5  | I40S1K0.5  | I40S1K1    | I40S1K1.5  |
| Parallel test results | 100.0      | 99.5       | 99.8       | 99.9       | 100.0      | 99.9       |
|                       | 99.9       | 99.8       | 99.4       | 99.9       | 99.4       | 99.5       |
|                       | 99.9       | 99.9       | 99.6       | 99.2       | 99.8       | 99.5       |
| Mean                  | 99.9       | 99.7       | 99.6       | 99.7       | 99.6       | 99.6       |
| CoV                   | 0.001      | 0.002      | 0.002      | 0.004      | 0.003      | 0.002      |
| Specimens             | I40S2K0.5  | I40S2K1    | I40S2K1.5  | I40S3K0.5  | I40S3K1    | I40S3K1.5  |
| Parallel test results | 99.3       | 99.6       | 99.7       | 99.7       | 99.9       | 99.1       |
|                       | 98.9       | 99.9       | 99.8       | 99.2       | 99.9       | 99.8       |
|                       | 99.9       | 100.0      | 99.2       | 99.5       | 99.6       | 99.1       |
| Mean                  | 99.4       | 99.8       | 99.6       | 99.5       | 99.8       | 99.3       |
| CoV                   | 0.005      | 0.002      | 0.003      | 0.003      | 0.002      | 0.004      |
| Specimens             | I20S2K1T40 | I20S2K1T60 | I20S2K1T75 | I40S2K1T40 | I40S2K1T60 | I40S2K1T75 |
| Parallel test results | 99.4       | 100.0      | 99.7       | 99.2       | 99.5       | 99.8       |
|                       | 99.2       | 99.9       | 99.9       | 99.5       | 99.6       | 99.8       |
|                       | 99.9       | 99.9       | 99.9       | 99.1       | 99.2       | 99.5       |
| Mean                  | 99.5       | 99.9       | 99.8       | 99.3       | 99.4       | 99.7       |
| CoV                   | 0.004      | 0.001      | 0.001      | 0.002      | 0.002      | 0.002      |

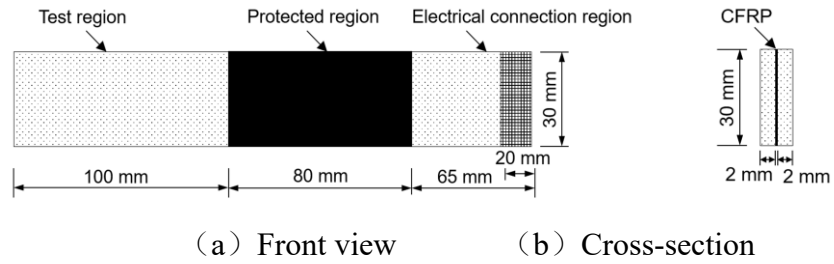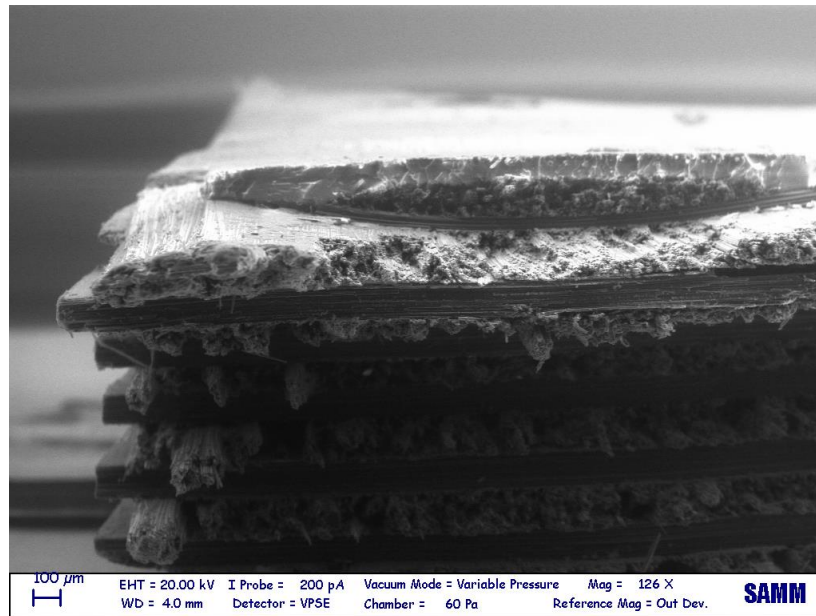

(c) SEM image of a typical CFRP sample

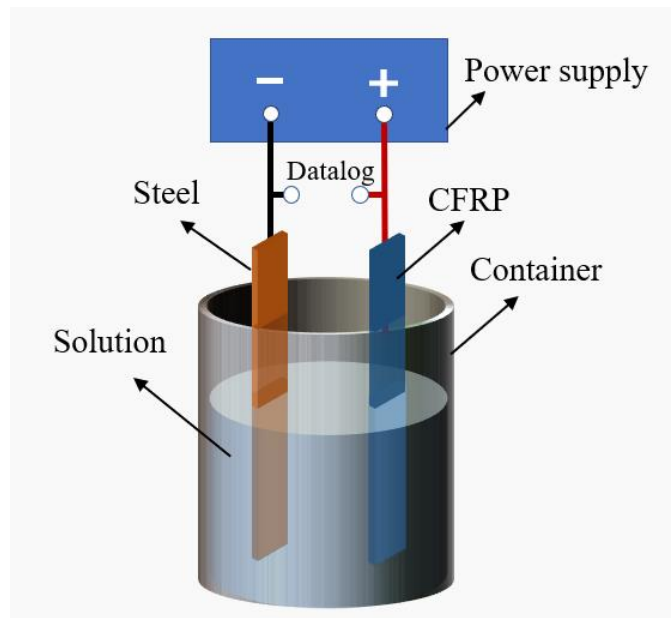

(d) Recycling system

**Figure SI 1. Composition, structure and testing of CFRPs. a) Front and b) cross-sectional views. c) Representative SEM image. d) Schematic of the recycling system.**

**Table SI 2. Components of the epoxy resin**

| Components                   | Mass fraction (%) |
|------------------------------|-------------------|
| Bisphenol-A-type epoxy resin | 37~38             |
| Novolac epoxy resin          | 19~20             |
| Dicyandiamide                | 5~6               |
| Methyl ethyl ketone          | 36~37             |

**Table SI 3. Labelling system of the test specimens**

| Test unit | Specimens  | Current I (mA) | Current density J (A/m <sup>2</sup> ) | NaCl concentration S (%) | KOH concentration K (g/L) | Temperature (°C) |
|-----------|------------|----------------|---------------------------------------|--------------------------|---------------------------|------------------|
| 1         | I20S0.5    | 20             | 3.33                                  | 0.5                      | 0                         | 25               |
|           | I20S1      | 20             | 3.33                                  | 1.0                      | 0                         | 25               |
|           | I20S2      | 20             | 3.33                                  | 2.0                      | 0                         | 25               |
|           | I20S3      | 20             | 3.33                                  | 3.0                      | 0                         | 25               |
|           | I40S0.5    | 40             | 6.67                                  | 0.5                      | 0                         | 25               |
|           | I40S1      | 40             | 6.67                                  | 1.0                      | 0                         | 25               |
|           | I40S2      | 40             | 6.67                                  | 2.0                      | 0                         | 25               |
|           | I40S3      | 40             | 6.67                                  | 3.0                      | 0                         | 25               |
|           | I62.5S0.5  | 62.5           | 10.42                                 | 0.5                      | 0                         | 25               |
|           | I62.5S1    | 62.5           | 10.42                                 | 1.0                      | 0                         | 25               |
|           | I62.5S2    | 62.5           | 10.42                                 | 2.0                      | 0                         | 25               |
|           | I62.5S3    | 62.5           | 10.42                                 | 3.0                      | 0                         | 25               |
|           | I78.1S0.5  | 78.1           | 13.20                                 | 0.5                      | 0                         | 25               |
|           | I78.1S1    | 78.1           | 13.20                                 | 1.0                      | 0                         | 25               |
|           | I78.1S2    | 78.1           | 13.20                                 | 2.0                      | 0                         | 25               |
|           | I78.1S3    | 78.1           | 13.20                                 | 3.0                      | 0                         | 25               |
|           | I104.2S0.5 | 104.2          | 17.36                                 | 0.5                      | 0                         | 25               |
|           | I104.2S1   | 104.2          | 17.36                                 | 1.0                      | 0                         | 25               |
|           | I104.2S2   | 104.2          | 17.36                                 | 2.0                      | 0                         | 25               |
|           | I104.2S3   | 104.2          | 17.36                                 | 3.0                      | 0                         | 25               |
|           | I156.3S0.5 | 156.3          | 26.04                                 | 0.5                      | 0                         | 25               |
|           | I156.3S1   | 156.3          | 26.04                                 | 1.0                      | 0                         | 25               |
|           | I156.3S2   | 156.3          | 26.04                                 | 2.0                      | 0                         | 25               |
|           | I156.3S3   | 156.3          | 26.04                                 | 3.0                      | 0                         | 25               |
| 2         | I20S1K0.5  | 20             | 3.33                                  | 1.0                      | 0.5                       | 25               |
|           | I20S1K1    | 20             | 3.33                                  | 1.0                      | 1.0                       | 25               |
|           | I20S1K1.5  | 20             | 3.33                                  | 1.0                      | 1.5                       | 25               |
|           | I20S2K0.5  | 20             | 3.33                                  | 2.0                      | 0.5                       | 25               |
|           | I20S2K1    | 20             | 3.33                                  | 2.0                      | 1.0                       | 25               |
|           | I20S2K1.5  | 20             | 3.33                                  | 2.0                      | 1.5                       | 25               |
|           | I20S3K0.5  | 20             | 3.33                                  | 3.0                      | 0.5                       | 25               |
|           | I20S3K1    | 20             | 3.33                                  | 3.0                      | 1.0                       | 25               |
|           | I20S3K1.5  | 20             | 3.33                                  | 3.0                      | 1.5                       | 25               |
|           | I40S1K0.5  | 40             | 6.67                                  | 1.0                      | 0.5                       | 25               |
|           | I40S1K1    | 40             | 6.67                                  | 1.0                      | 1.0                       | 25               |
|           | I40S1K1.5  | 40             | 6.67                                  | 1.0                      | 1.5                       | 25               |
|           | I40S2K0.5  | 40             | 6.67                                  | 2.0                      | 0.5                       | 25               |
|           | I40S2K1    | 40             | 6.67                                  | 2.0                      | 1.0                       | 25               |
|           | I40S2K1.5  | 40             | 6.67                                  | 2.0                      | 1.5                       | 25               |
|           | I40S3K0.5  | 40             | 6.67                                  | 3.0                      | 0.5                       | 25               |
|           | I40S3K1    | 40             | 6.67                                  | 3.0                      | 1.0                       | 25               |
|           | I40S3K1.5  | 40             | 6.67                                  | 3.0                      | 1.5                       | 25               |
| 3         | I20S2K1T40 | 20             | 3.33                                  | 2.0                      | 1.0                       | 40               |
|           | I20S2K1T60 | 20             | 3.33                                  | 2.0                      | 1.0                       | 60               |
|           | I20S2K1T75 | 20             | 3.33                                  | 2.0                      | 1.0                       | 75               |
|           | I40S2K1T40 | 40             | 6.67                                  | 2.0                      | 1.0                       | 40               |
|           | I40S2K1T60 | 40             | 6.67                                  | 2.0                      | 1.0                       | 60               |
|           | I40S2K1T75 | 40             | 6.67                                  | 2.0                      | 1.0                       | 75               |

## **Recycled Carbon Fibers**

### **System voltage**

During an electrochemical recovery process, carbon fibers can degrade and increase the resistivity of the sample, causing changes in the system voltage. The trial test of sample voltage monitoring shows that the smaller the current density is, the smaller and more stable the voltage is during electrochemical recovery. In the recovery cycle, the NaCl concentration has little effect on the voltage. When the NaCl concentration is 2%, the sample voltage is the lowest of the examined samples, and thus, the energy consumed during the recovery process is the lowest. Therefore, a concentration of 2% was selected as the optimal NaCl concentration. The concentration of the catalyst, KOH, has a negligible effect on the sample voltage, especially under low current conditions. Figure SI 2(c) shows that the voltage for all samples ranges from 2.5 to 3.1 V, and the sample voltage is essentially stable during the entire recovery period, indicating that the sample does not experience significant deterioration. The energy consumption of the test sample is the product of the voltage, the current and the elapsed time. Therefore, the recovery system voltage can be used to assess carbon fiber degradation and energy consumption in different recovery processes. In summary, if the NaCl concentration is 2% and the current density is 3.33 or 6.67 A/m<sup>2</sup>, the system voltage is stable, and the sample does not significantly degrade and the energy consumption is minimal.

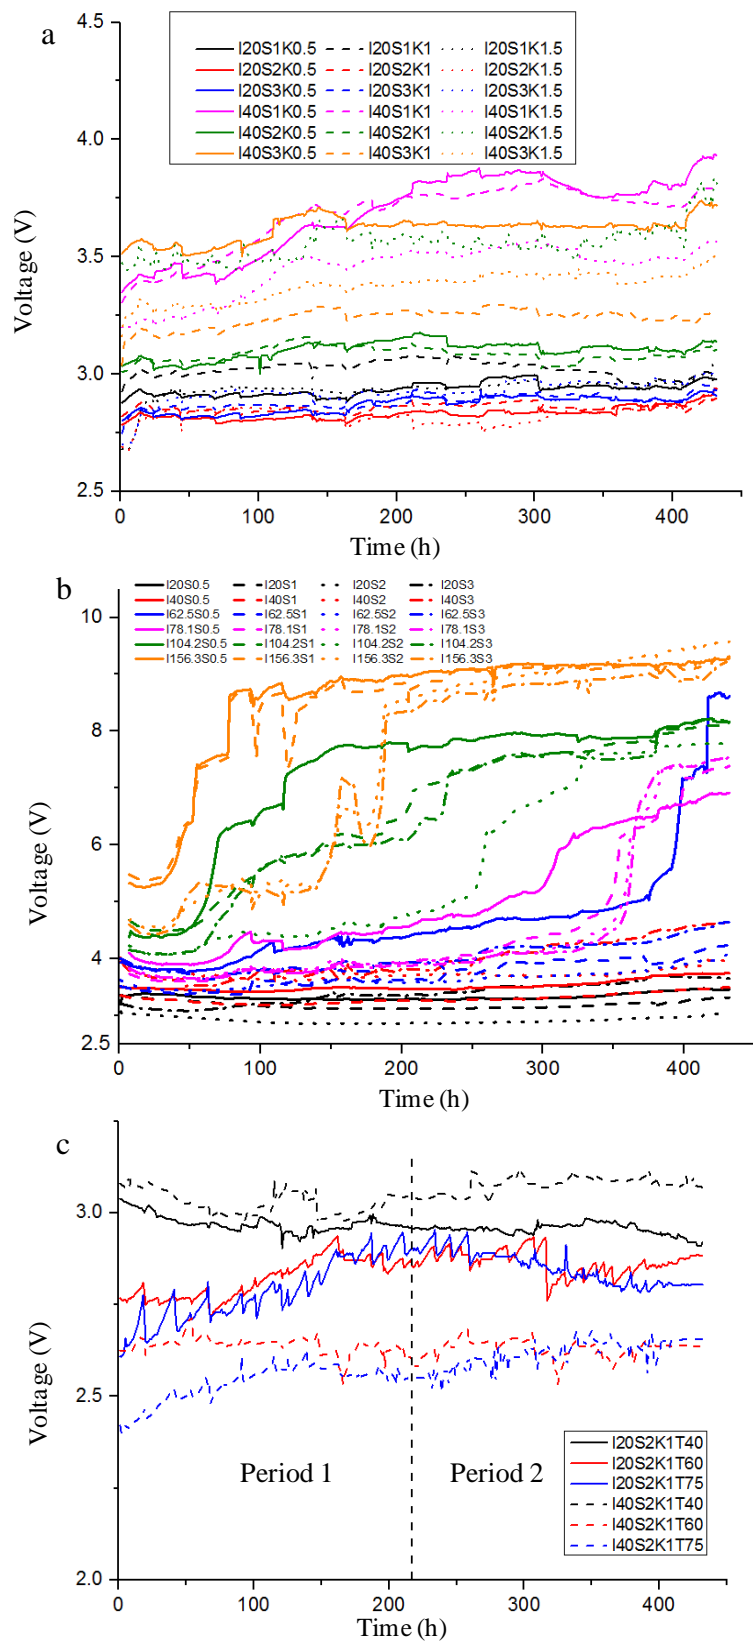

**Figure SI 2 Plot of system voltage** a. Effect of NaCl concentration; b. Effect of KOH concentration; c. Effect of temperature.

**Table SI 4 Experimental results of tensile tests**

| Specimens    | VCF   | I20S0.5 | I20S1 | I20S2 | I20S3 | I40S0.5 | I40S1 | I40S2 | I40S3 | I62.5S0.5 | I62.5S1 | I62.5S2 | I62.5S3 |
|--------------|-------|---------|-------|-------|-------|---------|-------|-------|-------|-----------|---------|---------|---------|
|              | 4.592 | 2.578   | 3.482 | 3.658 | 3.442 | 2.672   | 3.368 | 3.595 | 3.558 | 2.345     | 2.451   | 2.489   | 2.485   |
|              | 4.331 | 2.454   | 3.607 | 3.465 | 3.546 | 2.475   | 3.486 | 3.574 | 3.408 | 2.311     | 2.591   | 2.460   | 2.466   |
|              | 4.719 | 2.654   | 3.675 | 3.856 | 3.575 | 2.657   | 3.337 | 3.589 | 3.382 | 2.475     | 2.576   | 2.779   | 2.657   |
|              | 4.361 | 2.753   | 3.427 | 3.746 | 3.389 | 2.561   | 3.478 | 3.720 | 3.363 | 2.456     | 2.310   | 2.443   | 2.389   |
|              | 4.890 | 2.692   | 3.234 | 3.862 | 3.462 | 2.564   | 3.556 | 3.571 | 3.514 | 2.228     | 2.410   | 2.752   | 2.387   |
|              | 4.649 | 2.641   | 3.561 | 3.845 | 3.561 | 2.471   | 3.409 | 3.540 | 3.465 | 2.475     | 2.618   | 2.566   | 2.565   |
|              | 4.672 | 2.696   | 3.543 | 3.991 | 3.398 | 2.444   | 3.451 | 3.572 | 3.557 | 2.477     | 2.589   | 2.354   | 2.490   |
|              | 4.785 | 2.513   | 3.669 | 3.851 | 3.456 | 2.659   | 3.399 | 3.537 | 3.300 | 2.441     | 2.352   | 2.622   | 2.565   |
|              | 4.879 | 2.493   | 3.231 | 3.946 | 3.438 | 2.671   | 3.319 | 3.901 | 3.462 | 2.292     | 2.584   | 2.463   | 2.509   |
| Parallel     | 4.501 | 2.617   | 3.279 | 3.915 | 3.409 | 2.475   | 3.366 | 3.800 | 3.471 | 2.461     | 2.434   | 2.442   | 2.567   |
| test results | 4.635 | 2.628   | 3.375 | 3.887 | 3.456 | 2.659   | 3.417 | 3.772 | 3.578 | 2.375     | 2.341   | 2.787   | 2.677   |
|              | 4.481 | 2.619   | 3.597 | 3.804 | 3.616 | 2.541   | 3.577 | 3.620 | 3.298 | 2.556     | 2.441   | 2.361   | 2.329   |
|              | 4.434 | 2.497   | 3.354 | 3.615 | 3.547 | 2.577   | 3.222 | 3.737 | 3.590 | 2.203     | 2.563   | 2.509   | 2.389   |
|              | 4.674 | 2.785   | 3.563 | 3.648 | 3.481 | 2.554   | 3.396 | 3.802 | 3.565 | 2.430     | 2.510   | 2.689   | 2.343   |
|              | 4.590 | 2.760   | 3.635 | 3.542 | 3.567 | 2.686   | 3.398 | 3.892 | 3.567 | 2.530     | 2.489   | 2.501   | 2.507   |
|              | 4.422 | 2.754   | 3.384 | 3.834 | 3.501 | 2.476   | 3.268 | 3.789 | 3.456 | 2.345     | 2.551   | 2.672   | 2.666   |
|              | 4.726 | 2.456   | 3.667 | 3.588 | 3.586 | 2.549   | 3.563 | 3.780 | 3.454 | 2.546     | 2.444   | 2.459   | 2.501   |
|              | 4.709 | 2.753   | 3.498 | 3.921 | 3.364 | 2.751   | 3.448 | 3.610 | 3.376 | 2.301     | 2.353   | 2.522   | 2.534   |
|              | 4.898 | 2.732   | 3.412 | 3.479 | 3.513 | 2.704   | 3.422 | 3.547 | 3.410 | 2.266     | 2.401   | 2.677   | 2.529   |
|              | 4.875 | 2.607   | 3.241 | 3.902 | 3.451 | 2.512   | 3.450 | 3.907 | 3.378 | 2.207     | 2.416   | 2.690   | 2.620   |
| Mean         | 4.641 | 2.634   | 3.472 | 3.768 | 3.488 | 2.583   | 3.417 | 3.693 | 3.458 | 2.386     | 2.471   | 2.562   | 2.509   |
| CoV          | 0.038 | 0.041   | 0.044 | 0.043 | 0.021 | 0.036   | 0.027 | 0.035 | 0.027 | 0.048     | 0.039   | 0.053   | 0.041   |

**Table SI 4 Cont.**

| Specimens             | I20S1K0.5 | I20S1K1 | I20S1K1.5 | I20S2K0.5 | I20S2K1 | I20S2K1.5 | I20S3K0.5 | I20S3K1 | I20S3K1.5 |
|-----------------------|-----------|---------|-----------|-----------|---------|-----------|-----------|---------|-----------|
|                       | 3.566     | 3.384   | 3.101     | 3.357     | 3.298   | 3.211     | 3.590     | 3.484   | 2.781     |
|                       | 3.290     | 3.369   | 3.109     | 3.256     | 3.212   | 3.090     | 3.212     | 3.059   | 2.798     |
|                       | 3.478     | 3.338   | 3.087     | 3.467     | 3.209   | 3.085     | 3.390     | 3.487   | 3.098     |
|                       | 3.298     | 3.283   | 2.676     | 3.679     | 3.487   | 2.908     | 3.297     | 3.478   | 2.915     |
|                       | 3.383     | 3.291   | 2.666     | 3.557     | 3.658   | 2.979     | 3.201     | 3.477   | 3.054     |
|                       | 3.275     | 3.107   | 2.657     | 3.653     | 3.109   | 3.172     | 3.672     | 3.481   | 2.776     |
|                       | 3.367     | 3.108   | 3.085     | 3.331     | 3.197   | 3.001     | 3.567     | 3.013   | 2.806     |
|                       | 3.518     | 2.978   | 2.622     | 3.678     | 3.110   | 2.889     | 3.278     | 3.567   | 2.872     |
|                       | 3.303     | 3.324   | 3.098     | 3.333     | 3.612   | 2.980     | 3.284     | 3.200   | 3.098     |
| Parallel test results | 3.311     | 3.261   | 2.708     | 3.365     | 3.411   | 3.109     | 3.578     | 3.156   | 3.095     |
|                       | 3.466     | 3.110   | 2.890     | 3.588     | 3.131   | 3.103     | 3.256     | 3.051   | 2.915     |
|                       | 3.254     | 3.246   | 2.955     | 3.265     | 3.617   | 2.994     | 3.589     | 3.082   | 3.108     |
|                       | 3.477     | 3.101   | 3.009     | 3.390     | 3.356   | 2.988     | 3.261     | 3.001   | 3.067     |
|                       | 3.354     | 3.006   | 3.004     | 3.467     | 3.399   | 2.994     | 3.334     | 3.101   | 3.088     |
|                       | 3.490     | 3.018   | 3.065     | 3.415     | 3.587   | 3.039     | 3.290     | 2.993   | 3.104     |
|                       | 3.319     | 3.090   | 3.050     | 3.586     | 3.100   | 2.906     | 3.458     | 2.981   | 3.061     |
|                       | 3.474     | 3.003   | 3.043     | 3.267     | 3.121   | 2.988     | 3.592     | 3.053   | 2.895     |
|                       | 3.344     | 3.062   | 3.098     | 3.272     | 3.188   | 3.056     | 3.635     | 3.095   | 2.798     |
|                       | 3.487     | 3.093   | 3.078     | 3.270     | 3.293   | 3.034     | 3.202     | 2.997   | 3.004     |
|                       | 3.520     | 3.122   | 3.041     | 3.320     | 3.105   | 2.903     | 3.577     | 3.199   | 2.994     |
| Mean                  | 3.399     | 3.165   | 2.952     | 3.426     | 3.310   | 3.021     | 3.413     | 3.198   | 2.966     |
| CoV                   | 0.029     | 0.042   | 0.060     | 0.043     | 0.059   | 0.029     | 0.049     | 0.066   | 0.043     |



**Table SI 4 Cont.**

| Specimens             | I40S1K0.5 | I40S1K1 | I40S1K1.5 | I40S2K0.5 | I40S2K1 | I40S2K1.5 | I40S3K0.5 | I40S3K1 | I40S3K1.5 |
|-----------------------|-----------|---------|-----------|-----------|---------|-----------|-----------|---------|-----------|
|                       | 3.398     | 3.076   | 2.590     | 3.410     | 2.929   | 3.057     | 3.467     | 3.029   | 2.647     |
|                       | 3.587     | 3.098   | 2.487     | 3.095     | 2.887   | 2.489     | 3.498     | 3.073   | 2.447     |
|                       | 3.346     | 3.109   | 2.876     | 3.198     | 2.567   | 2.987     | 3.309     | 2.980   | 2.594     |
|                       | 3.285     | 2.870   | 2.776     | 3.196     | 2.768   | 2.609     | 3.161     | 2.812   | 2.569     |
|                       | 3.577     | 2.975   | 2.640     | 3.109     | 2.898   | 2.897     | 3.267     | 2.820   | 2.456     |
|                       | 3.409     | 3.087   | 2.561     | 3.322     | 2.785   | 2.563     | 3.180     | 2.986   | 2.768     |
|                       | 3.480     | 3.109   | 2.567     | 3.310     | 2.900   | 2.590     | 3.134     | 3.076   | 2.901     |
|                       | 3.201     | 3.008   | 2.567     | 3.561     | 2.765   | 2.556     | 3.295     | 2.860   | 2.903     |
|                       | 3.242     | 3.110   | 2.721     | 3.170     | 2.890   | 2.546     | 3.476     | 3.048   | 2.789     |
| Parallel test results | 3.498     | 2.809   | 2.652     | 3.592     | 2.710   | 2.698     | 3.550     | 2.971   | 2.550     |
|                       | 3.108     | 2.891   | 2.803     | 3.562     | 2.667   | 3.056     | 3.534     | 2.790   | 2.458     |
|                       | 3.103     | 2.787   | 2.709     | 3.545     | 2.583   | 3.090     | 3.481     | 2.947   | 2.487     |
|                       | 3.582     | 3.046   | 2.498     | 3.573     | 2.979   | 2.769     | 3.209     | 3.050   | 2.649     |
|                       | 3.220     | 3.167   | 2.820     | 3.365     | 3.004   | 2.890     | 3.356     | 3.011   | 2.469     |
|                       | 3.341     | 2.868   | 2.750     | 3.555     | 2.921   | 2.612     | 3.487     | 2.809   | 2.576     |
|                       | 3.361     | 2.901   | 2.816     | 3.274     | 2.735   | 2.680     | 3.301     | 2.783   | 2.878     |
|                       | 3.309     | 2.897   | 2.683     | 3.290     | 2.620   | 2.457     | 3.221     | 2.799   | 2.633     |
|                       | 3.202     | 2.998   | 2.661     | 3.180     | 2.541   | 2.780     | 3.370     | 2.789   | 2.877     |
|                       | 3.544     | 3.005   | 2.540     | 3.453     | 2.590   | 2.466     | 3.345     | 2.762   | 2.765     |
|                       | 3.343     | 2.785   | 2.610     | 3.546     | 2.776   | 2.899     | 3.320     | 2.803   | 2.793     |
| Mean                  | 3.357     | 2.980   | 2.666     | 3.365     | 2.776   | 2.735     | 3.348     | 2.910   | 2.660     |
| CoV                   | 0.045     | 0.040   | 0.043     | 0.051     | 0.053   | 0.077     | 0.039     | 0.040   | 0.061     |

**Table SI 4 Cont.**

| Specimens     | I20S2K1T40 | I20S2K1T60 | I20S2K1T75 | I40S2K1T40 | I40S2K1T60 | I40S2K1T75 |
|---------------|------------|------------|------------|------------|------------|------------|
|               | 3.661      | 4.098      | 4.311      | 3.768      | 4.008      | 4.243      |
|               | 3.587      | 4.167      | 3.999      | 3.625      | 4.123      | 4.253      |
|               | 3.663      | 3.948      | 4.203      | 3.611      | 4.127      | 4.187      |
|               | 3.656      | 4.047      | 4.020      | 3.899      | 4.098      | 4.087      |
|               | 3.902      | 4.146      | 3.990      | 3.567      | 4.245      | 3.989      |
|               | 3.658      | 4.100      | 4.123      | 3.895      | 4.089      | 3.981      |
|               | 3.787      | 4.109      | 4.010      | 3.817      | 4.243      | 4.104      |
|               | 3.655      | 4.255      | 4.006      | 3.895      | 4.096      | 4.007      |
|               | 3.761      | 4.178      | 3.995      | 3.802      | 4.071      | 4.082      |
| Parallel test | 3.789      | 3.993      | 3.939      | 3.566      | 4.014      | 4.276      |
| results       | 3.754      | 3.982      | 4.277      | 3.689      | 4.099      | 4.280      |
|               | 3.653      | 4.017      | 4.090      | 3.698      | 4.247      | 4.341      |
|               | 3.879      | 3.999      | 3.989      | 3.787      | 4.202      | 4.399      |
|               | 3.889      | 3.921      | 3.998      | 3.677      | 4.109      | 3.998      |
|               | 3.909      | 4.018      | 4.003      | 3.812      | 4.088      | 4.087      |
|               | 3.804      | 3.945      | 3.909      | 3.903      | 3.999      | 4.245      |
|               | 3.820      | 3.991      | 4.321      | 3.890      | 4.024      | 4.175      |
|               | 3.729      | 3.998      | 4.126      | 3.728      | 4.266      | 4.151      |
|               | 3.810      | 3.991      | 4.089      | 3.710      | 4.156      | 4.085      |
|               | 3.812      | 3.990      | 4.265      | 3.829      | 4.209      | 4.063      |
| Mean          | 3.759      | 4.045      | 4.083      | 3.758      | 4.126      | 4.152      |
| CoV           | 0.026      | 0.022      | 0.031      | 0.030      | 0.021      | 0.030      |

**Table SI 5 Measured diameters of carbon fiber**

| Specimens             | VCF   | I20S0.5 | I20S1 | I20S2 | I20S3 | I40S0.5 | I40S1 | I40S2 | I40S3 | I62.5S0.5 | I62.5S1 | I62.5S2 | I62.5S3 |
|-----------------------|-------|---------|-------|-------|-------|---------|-------|-------|-------|-----------|---------|---------|---------|
|                       | 7.01  | 6.93    | 6.97  | 6.95  | 6.96  | 6.94    | 6.94  | 6.90  | 6.94  | 6.99      | 6.91    | 6.90    | 6.98    |
|                       | 6.97  | 6.95    | 6.93  | 6.92  | 6.97  | 6.98    | 6.99  | 6.92  | 6.90  | 7.22      | 6.99    | 6.91    | 6.90    |
|                       | 7.03  | 6.92    | 6.95  | 6.97  | 6.93  | 6.94    | 6.94  | 6.96  | 6.94  | 7.21      | 7.00    | 6.89    | 6.83    |
|                       | 7.01  | 6.98    | 6.93  | 6.99  | 6.97  | 6.93    | 6.92  | 6.94  | 6.96  | 7.16      | 7.01    | 6.94    | 6.87    |
|                       | 7.00  | 6.92    | 6.99  | 7.01  | 6.99  | 6.92    | 6.97  | 7.01  | 6.98  | 7.12      | 7.01    | 6.83    | 6.89    |
|                       | 6.99  | 6.96    | 6.99  | 6.94  | 6.92  | 6.93    | 6.98  | 7.03  | 6.91  | 7.05      | 7.00    | 7.01    | 7.00    |
|                       | 6.99  | 6.97    | 6.95  | 6.97  | 6.99  | 7.00    | 7.00  | 6.91  | 7.00  | 7.19      | 6.94    | 6.99    | 6.98    |
|                       | 6.99  | 6.98    | 6.98  | 6.93  | 6.98  | 6.98    | 6.95  | 6.95  | 6.93  | 7.11      | 6.96    | 6.98    | 6.93    |
|                       | 7.00  | 6.99    | 7.00  | 6.98  | 6.97  | 6.99    | 6.91  | 6.94  | 6.97  | 7.03      | 6.99    | 7.00    | 6.90    |
| Parallel test results | 7.01  | 7.00    | 6.92  | 7.00  | 6.96  | 6.94    | 6.96  | 6.94  | 6.98  | 7.10      | 7.04    | 6.91    | 7.02    |
|                       | 7.04  | 6.98    | 6.98  | 6.95  | 6.95  | 6.96    | 6.93  | 7.02  | 6.92  | 6.99      | 6.95    | 6.82    | 6.93    |
|                       | 6.98  | 6.92    | 6.91  | 6.98  | 6.94  | 6.92    | 6.92  | 7.00  | 7.00  | 6.98      | 6.92    | 6.86    | 6.89    |
|                       | 7.01  | 6.93    | 7.03  | 6.98  | 6.96  | 6.99    | 7.01  | 6.95  | 6.97  | 7.13      | 7.05    | 7.00    | 6.88    |
|                       | 6.98  | 6.96    | 6.92  | 6.97  | 6.98  | 6.95    | 6.95  | 6.99  | 6.92  | 7.15      | 7.02    | 6.89    | 7.01    |
|                       | 7.01  | 6.98    | 6.91  | 6.94  | 7.02  | 7.01    | 7.01  | 6.91  | 6.91  | 7.16      | 7.00    | 6.85    | 6.89    |
|                       | 7.02  | 6.99    | 6.96  | 6.96  | 6.97  | 6.97    | 6.98  | 6.92  | 7.01  | 7.18      | 6.94    | 6.96    | 6.91    |
|                       | 7.00  | 7.00    | 6.93  | 6.99  | 6.92  | 6.94    | 6.92  | 6.94  | 6.94  | 7.14      | 6.97    | 6.94    | 6.97    |
|                       | 7.00  | 6.96    | 6.92  | 6.94  | 6.93  | 7.03    | 6.92  | 6.93  | 7.02  | 7.18      | 6.92    | 6.88    | 6.95    |
|                       | 6.99  | 6.98    | 6.96  | 6.96  | 6.95  | 6.99    | 6.93  | 6.93  | 6.93  | 7.03      | 6.94    | 6.90    | 6.98    |
| 7.02                  | 7.01  | 6.95    | 6.94  | 6.95  | 6.97  | 6.94    | 6.99  | 6.96  | 7.20  | 6.93      | 7.01    | 6.99    |         |
| Mean                  | 7.00  | 6.97    | 6.95  | 6.96  | 6.96  | 6.96    | 6.95  | 6.95  | 6.95  | 7.12      | 6.97    | 6.92    | 6.94    |
| CoV                   | 0.002 | 0.004   | 0.005 | 0.004 | 0.004 | 0.005   | 0.005 | 0.006 | 0.005 | 0.011     | 0.006   | 0.009   | 0.008   |

**Table SI 5 Cont.**

| Specimens             | I20S1K0.5 | I20S1K1 | I20S1K1.5 | I20S2K0.5 | I20S2K1 | I20S2K1.5 | I20S3K0.5 | I20S3K1 | I20S3K1.5 |
|-----------------------|-----------|---------|-----------|-----------|---------|-----------|-----------|---------|-----------|
|                       | 6.97      | 6.87    | 6.87      | 6.92      | 6.88    | 6.95      | 6.98      | 6.90    | 6.89      |
|                       | 6.93      | 6.90    | 6.82      | 6.89      | 6.90    | 6.87      | 6.91      | 6.94    | 6.88      |
|                       | 6.92      | 6.89    | 6.85      | 6.93      | 6.89    | 6.80      | 6.85      | 6.96    | 6.84      |
|                       | 6.84      | 6.94    | 6.81      | 6.92      | 6.94    | 6.79      | 6.93      | 6.89    | 7.00      |
|                       | 6.99      | 6.90    | 6.79      | 6.89      | 6.96    | 6.95      | 6.87      | 6.83    | 6.92      |
|                       | 7.00      | 6.93    | 6.93      | 7.00      | 6.90    | 6.93      | 6.84      | 6.89    | 6.94      |
|                       | 7.01      | 6.89    | 6.96      | 6.98      | 6.96    | 6.97      | 6.88      | 6.88    | 6.99      |
|                       | 6.89      | 6.86    | 6.86      | 6.94      | 6.91    | 6.84      | 6.98      | 6.84    | 6.89      |
|                       | 6.94      | 6.83    | 6.76      | 6.94      | 6.79    | 6.87      | 6.92      | 6.99    | 6.79      |
| Parallel test results | 6.98      | 6.85    | 6.81      | 6.92      | 6.80    | 6.82      | 6.90      | 7.00    | 6.84      |
|                       | 6.89      | 6.89    | 6.87      | 6.97      | 6.92    | 6.89      | 6.94      | 7.01    | 6.85      |
|                       | 6.90      | 6.94    | 6.85      | 6.93      | 6.96    | 6.88      | 6.98      | 6.91    | 6.89      |
|                       | 6.97      | 7.03    | 6.79      | 6.97      | 6.89    | 6.83      | 6.83      | 6.85    | 6.87      |
|                       | 6.98      | 6.91    | 6.79      | 6.95      | 6.94    | 6.92      | 6.97      | 6.82    | 6.83      |
|                       | 6.91      | 6.94    | 6.90      | 7.00      | 6.90    | 6.85      | 7.00      | 6.89    | 6.84      |
|                       | 6.92      | 6.98    | 6.89      | 6.90      | 6.87    | 6.83      | 6.93      | 6.92    | 6.82      |
|                       | 6.90      | 6.97    | 6.85      | 6.92      | 6.91    | 6.82      | 6.98      | 6.94    | 6.80      |
|                       | 6.87      | 6.96    | 6.93      | 6.99      | 6.83    | 6.91      | 6.99      | 6.93    | 6.81      |
|                       | 6.90      | 6.96    | 6.86      | 6.97      | 6.94    | 6.80      | 6.92      | 6.98    | 6.79      |
|                       | 6.95      | 6.84    | 6.82      | 6.96      | 6.91    | 6.84      | 6.94      | 6.95    | 6.81      |
| Mean                  | 6.93      | 6.91    | 6.85      | 6.94      | 6.90    | 6.87      | 6.93      | 6.92    | 6.86      |
| CoV                   | 0.007     | 0.008   | 0.008     | 0.005     | 0.007   | 0.008     | 0.008     | 0.008   | 0.009     |

**Table SI 5 Cont.**

| Specimens             | I40S1K0.5 | I40S1K1 | I40S1K1.5 | I40S2K0.5 | I40S2K1 | I40S2K1.5 | I40S3K0.5 | I40S3K1 | I40S3K1.5 |
|-----------------------|-----------|---------|-----------|-----------|---------|-----------|-----------|---------|-----------|
|                       | 6.86      | 6.80    | 6.81      | 6.84      | 6.80    | 6.78      | 6.89      | 6.90    | 6.84      |
|                       | 6.89      | 6.83    | 6.80      | 6.87      | 6.81    | 6.83      | 6.87      | 6.91    | 6.79      |
|                       | 6.79      | 6.89    | 6.78      | 6.89      | 6.91    | 6.82      | 6.90      | 6.86    | 6.73      |
|                       | 6.93      | 6.83    | 6.79      | 6.87      | 6.76    | 6.82      | 6.80      | 6.87    | 6.74      |
|                       | 6.96      | 6.89    | 6.82      | 6.81      | 6.81    | 6.90      | 6.81      | 6.81    | 6.90      |
|                       | 7.00      | 6.84    | 6.85      | 6.80      | 6.80    | 6.83      | 6.79      | 6.76    | 6.82      |
|                       | 6.78      | 6.87    | 6.88      | 6.94      | 6.82    | 6.78      | 6.91      | 6.89    | 6.86      |
|                       | 6.86      | 6.88    | 6.75      | 6.84      | 6.85    | 6.90      | 6.92      | 6.73    | 6.87      |
|                       | 6.83      | 6.81    | 6.79      | 6.93      | 6.88    | 6.79      | 6.94      | 6.89    | 6.83      |
| Parallel test results | 6.90      | 6.85    | 6.83      | 6.90      | 6.94    | 6.85      | 6.72      | 6.84    | 6.82      |
|                       | 6.86      | 6.87    | 6.84      | 6.95      | 6.98    | 6.82      | 6.93      | 6.75    | 6.80      |
|                       | 6.81      | 6.89    | 6.88      | 6.83      | 6.79    | 6.85      | 6.99      | 6.83    | 6.91      |
|                       | 6.83      | 6.90    | 6.82      | 6.91      | 6.72    | 6.89      | 6.86      | 6.89    | 6.77      |
|                       | 6.87      | 6.81    | 6.76      | 6.99      | 6.89    | 6.84      | 6.89      | 6.82    | 6.80      |
|                       | 6.88      | 6.84    | 6.75      | 6.83      | 6.77    | 6.81      | 6.97      | 6.84    | 6.83      |
|                       | 6.81      | 6.82    | 6.82      | 6.80      | 6.80    | 6.91      | 6.96      | 6.80    | 6.89      |
|                       | 6.92      | 6.89    | 6.84      | 6.82      | 6.93    | 6.78      | 6.92      | 6.86    | 6.83      |
|                       | 6.88      | 6.84    | 6.90      | 6.93      | 6.91    | 6.82      | 6.82      | 6.86    | 6.84      |
|                       | 6.85      | 6.81    | 6.78      | 6.91      | 6.87    | 6.74      | 6.80      | 6.94    | 6.80      |
|                       | 6.91      | 6.87    | 6.71      | 6.89      | 6.83    | 6.73      | 6.76      | 6.94    | 6.81      |
| Mean                  | 6.87      | 6.85    | 6.81      | 6.88      | 6.84    | 6.82      | 6.87      | 6.85    | 6.82      |
| CoV                   | 0.008     | 0.005   | 0.007     | 0.008     | 0.010   | 0.007     | 0.011     | 0.009   | 0.007     |

**Table SI 5 Cont.**

| Specimens             | I20S2K1T40 | I20S2K1T60 | I20S2K1T75 | I40S2K1T40 | I40S2K1T60 | I40S2K1T75 |
|-----------------------|------------|------------|------------|------------|------------|------------|
|                       | 7.01       | 7.04       | 7.00       | 7.09       | 6.89       | 6.96       |
|                       | 7.00       | 6.97       | 7.02       | 6.99       | 6.91       | 7.06       |
|                       | 6.98       | 6.95       | 7.03       | 6.98       | 6.97       | 7.05       |
|                       | 6.93       | 7.01       | 6.99       | 7.01       | 7.08       | 6.93       |
|                       | 6.96       | 7.00       | 6.91       | 7.04       | 6.93       | 6.97       |
|                       | 6.99       | 6.99       | 6.97       | 7.03       | 6.99       | 6.92       |
|                       | 7.05       | 6.98       | 7.02       | 6.93       | 7.01       | 7.00       |
|                       | 6.92       | 7.02       | 7.01       | 6.95       | 7.00       | 6.96       |
|                       | 7.03       | 7.03       | 6.97       | 6.97       | 6.96       | 7.01       |
| Parallel test results | 7.01       | 6.94       | 6.94       | 7.06       | 6.97       | 6.92       |
|                       | 7.00       | 6.97       | 7.04       | 7.02       | 6.94       | 6.94       |
|                       | 6.91       | 7.06       | 7.03       | 7.00       | 7.05       | 7.02       |
|                       | 6.99       | 7.04       | 7.00       | 6.97       | 7.03       | 6.99       |
|                       | 6.91       | 6.95       | 6.91       | 6.99       | 7.05       | 7.04       |
|                       | 6.90       | 7.03       | 6.94       | 6.93       | 6.98       | 7.03       |
|                       | 6.99       | 7.01       | 6.98       | 7.02       | 6.92       | 7.01       |
|                       | 7.05       | 7.00       | 7.01       | 6.92       | 6.94       | 7.03       |
|                       | 7.03       | 7.00       | 6.97       | 7.01       | 7.07       | 7.10       |
|                       | 7.03       | 6.99       | 7.02       | 7.04       | 7.02       | 6.91       |
|                       | 7.01       | 7.00       | 6.95       | 7.03       | 6.98       | 7.00       |
| Mean                  | 6.99       | 7.00       | 6.99       | 7.00       | 6.98       | 6.99       |
| CoV                   | 0.007      | 0.005      | 0.006      | 0.006      | 0.008      | 0.008      |

**Table SI 6 Experimental results of interfacial shear strength (IFSS) tests**

| Specimens                   | VCF   | I20S1K0.5 | I20S1K1 | I20S1K1.5 | I20S2K0.5 | I20S2K1 | I20S2K1.5 | I20S3K0.5 | I20S3K1 | I20S3K1.5 | I40S2K0.5 |
|-----------------------------|-------|-----------|---------|-----------|-----------|---------|-----------|-----------|---------|-----------|-----------|
| Parallel<br>test<br>results | 28.84 | 29.65     | 33.43   | 32.65     | 29.10     | 37.20   | 33.28     | 28.61     | 34.27   | 33.26     | 28.06     |
|                             | 33.21 | 30.06     | 32.79   | 32.49     | 29.90     | 37.45   | 32.81     | 28.43     | 34.58   | 33.54     | 26.35     |
|                             | 31.18 | 29.13     | 34.17   | 33.15     | 30.31     | 37.62   | 33.06     | 29.44     | 33.35   | 34.15     | 26.62     |
|                             | 30.76 | 29.34     | 34.01   | 31.79     | 28.90     | 37.25   | 32.61     | 27.77     | 33.57   | 34.54     | 27.18     |
|                             | 31.02 | 30.22     | 33.05   | 33.72     | 29.34     | 37.62   | 33.57     | 29.87     | 34.49   | 32.74     | 26.81     |
| Mean                        | 31.00 | 29.69     | 33.48   | 32.76     | 29.50     | 37.43   | 33.06     | 28.83     | 34.06   | 33.65     | 27.00     |
| CoV                         | 0.050 | 0.016     | 0.018   | 0.022     | 0.020     | 0.005   | 0.011     | 0.029     | 0.016   | 0.021     | 0.025     |

  

| Specimens                   | I40S2K1 | I40S2K1.5 | I40S3K0.5 | I40S3K1 | I40S3K1.5 | I20S2K1T40 | I20S2K1T60 | I20S2K1T75 | I40S2K1T40 | I40S2K1T60 | I40S2K1T75 |
|-----------------------------|---------|-----------|-----------|---------|-----------|------------|------------|------------|------------|------------|------------|
| Parallel<br>test<br>results | 26.63   | 24.42     | 25.83     | 28.08   | 24.33     | 26.49      | 33.65      | 33.52      | 24.29      | 29.51      | 35.89      |
|                             | 29.07   | 25.14     | 26.85     | 28.65   | 25.38     | 24.76      | 33.52      | 34.52      | 25.49      | 31.56      | 34.97      |
|                             | 28.50   | 24.54     | 26.92     | 28.27   | 25.93     | 25.00      | 33.61      | 33.11      | 23.17      | 29.16      | 36.51      |
|                             | 28.15   | 23.80     | 25.10     | 26.90   | 24.13     | 26.71      | 31.98      | 32.79      | 26.04      | 28.06      | 34.24      |
|                             | 28.07   | 25.63     | 27.90     | 29.83   | 26.21     | 24.21      | 35.21      | 34.66      | 24.07      | 30.84      | 37.34      |
| Mean                        | 28.08   | 24.70     | 26.53     | 28.33   | 25.20     | 25.42      | 33.59      | 33.72      | 24.61      | 29.84      | 35.79      |
| CoV                         | 0.032   | 0.028     | 0.041     | 0.037   | 0.037     | 0.043      | 0.034      | 0.025      | 0.047      | 0.046      | 0.034      |

**Table SI 7 Experimental results of surface roughness**

| Specimens                | VCF   | I20S1K0.5 | I20S1K1 | I20S1K1.5 | I20S2K0.5 | I20S2K1 | I20S2K1.5 | I20S3K0.5 | I20S3K1 | I20S3K1.5 |
|--------------------------|-------|-----------|---------|-----------|-----------|---------|-----------|-----------|---------|-----------|
| Parallel<br>test results | 200   | 192       | 209     | 202       | 192       | 219     | 215       | 196       | 209     | 208       |
|                          | 204   | 194       | 213     | 201       | 195       | 221     | 206       | 191       | 206     | 199       |
|                          | 198   | 196       | 217     | 205       | 192       | 228     | 221       | 193       | 205     | 205       |
|                          | 197   | 189       | 218     | 210       | 199       | 221     | 201       | 194       | 216     | 200       |
|                          | 204   | 198       | 214     | 200       | 201       | 225     | 204       | 185       | 207     | 208       |
|                          | 201   | 192       | 210     | 212       | 197       | 226     | 213       | 186       | 209     | 203       |
|                          | 204   | 194       | 221     | 206       | 189       | 214     | 204       | 198       | 207     | 206       |
|                          | 202   | 198       | 216     | 207       | 192       | 216     | 223       | 189       | 210     | 199       |
|                          | 201   | 200       | 206     | 201       | 195       | 220     | 206       | 197       | 214     | 198       |
|                          | 198   | 193       | 210     | 208       | 196       | 219     | 216       | 198       | 217     | 205       |
|                          | 199   | 192       | 207     | 211       | 203       | 226     | 215       | 196       | 209     | 208       |
|                          | 197   | 194       | 205     | 206       | 189       | 223     | 210       | 200       | 208     | 197       |
|                          | 201   | 193       | 218     | 204       | 188       | 211     | 222       | 197       | 211     | 198       |
|                          | 198   | 195       | 216     | 210       | 199       | 206     | 212       | 194       | 204     | 204       |
|                          | 204   | 197       | 207     | 208       | 193       | 209     | 217       | 190       | 207     | 201       |
|                          | 205   | 197       | 222     | 201       | 202       | 219     | 208       | 194       | 211     | 200       |
|                          | 203   | 201       | 213     | 202       | 198       | 218     | 217       | 197       | 210     | 201       |
|                          | 198   | 200       | 214     | 205       | 201       | 217     | 218       | 185       | 206     | 205       |
|                          | 199   | 196       | 216     | 208       | 194       | 215     | 207       | 184       | 209     | 207       |
|                          | 203   | 198       | 218     | 201       | 198       | 222     | 216       | 186       | 208     | 206       |
| Mean                     | 201   | 195       | 214     | 205       | 196       | 219     | 213       | 193       | 209     | 203       |
| CoV                      | 0.013 | 0.016     | 0.023   | 0.018     | 0.023     | 0.026   | 0.030     | 0.027     | 0.016   | 0.018     |



**Table SI 7 Cont.**

| Specimens     | I40S2K0.5 | I40S2K1 | I40S2K1.5 | I40S3K0.5 | I40S3K1 | I40S3K1.5 |
|---------------|-----------|---------|-----------|-----------|---------|-----------|
|               | 187       | 195     | 173       | 186       | 193     | 178       |
|               | 186       | 201     | 172       | 184       | 200     | 179       |
|               | 186       | 198     | 181       | 189       | 193     | 180       |
|               | 190       | 199     | 170       | 193       | 196     | 179       |
|               | 191       | 201     | 172       | 198       | 194     | 180       |
|               | 186       | 196     | 182       | 193       | 198     | 172       |
|               | 182       | 206     | 171       | 186       | 203     | 175       |
|               | 183       | 199     | 171       | 188       | 192     | 179       |
|               | 187       | 202     | 180       | 187       | 193     | 180       |
| Parallel test | 182       | 196     | 174       | 195       | 197     | 182       |
| results       | 186       | 195     | 182       | 186       | 206     | 184       |
|               | 189       | 203     | 169       | 193       | 199     | 179       |
|               | 184       | 205     | 181       | 191       | 204     | 182       |
|               | 189       | 192     | 170       | 189       | 194     | 174       |
|               | 185       | 198     | 172       | 182       | 195     | 171       |
|               | 189       | 200     | 184       | 196       | 198     | 172       |
|               | 182       | 206     | 180       | 183       | 195     | 181       |
|               | 179       | 198     | 170       | 192       | 199     | 179       |
|               | 183       | 204     | 176       | 185       | 201     | 180       |
|               | 179       | 194     | 176       | 193       | 198     | 174       |
| Mean          | 185       | 199     | 175       | 189       | 197     | 178       |
| CoV           | 0.019     | 0.021   | 0.029     | 0.024     | 0.020   | 0.021     |

**Table SI 7 Cont.**

| Specimens             | I20S2K1T40 | I20S2K1T60 | I20S2K1T75 | I40S2K1T40 | I40S2K1T60 | I40S2K1T75 |
|-----------------------|------------|------------|------------|------------|------------|------------|
|                       | 192        | 201        | 211        | 198        | 201        | 210        |
|                       | 197        | 205        | 213        | 194        | 193        | 209        |
|                       | 189        | 197        | 205        | 200        | 200        | 216        |
|                       | 194        | 210        | 215        | 196        | 193        | 208        |
|                       | 184        | 200        | 204        | 191        | 205        | 213        |
|                       | 193        | 208        | 205        | 194        | 195        | 206        |
|                       | 187        | 203        | 216        | 195        | 210        | 218        |
|                       | 194        | 201        | 203        | 189        | 193        | 216        |
|                       | 189        | 201        | 204        | 202        | 192        | 213        |
| Parallel test results | 185        | 198        | 213        | 196        | 204        | 215        |
|                       | 186        | 205        | 205        | 188        | 192        | 206        |
|                       | 198        | 200        | 205        | 189        | 205        | 214        |
|                       | 185        | 199        | 214        | 197        | 195        | 203        |
|                       | 197        | 203        | 208        | 201        | 203        | 215        |
|                       | 184        | 201        | 203        | 198        | 193        | 204        |
|                       | 194        | 206        | 201        | 196        | 203        | 211        |
|                       | 189        | 201        | 207        | 197        | 194        | 201        |
|                       | 188        | 203        | 204        | 201        | 207        | 210        |
|                       | 183        | 207        | 211        | 192        | 201        | 215        |
|                       | 189        | 202        | 210        | 194        | 195        | 208        |
| Mean                  | 190        | 203        | 208        | 195        | 199        | 211        |
| CoV                   | 0.025      | 0.017      | 0.022      | 0.021      | 0.029      | 0.023      |
